# Supplementary material
Source: PubMed Central journal article supplement (PMC4001758)
Supplement: tjp0592-1873-sd1.pdf [file tjp0592-1873-sd1.pdf]

## Supporting information

Supp table 1. Basic characteristics.

|                                       | Placebo (n=7) |          | Resveratrol (n=9) |          |
|---------------------------------------|---------------|----------|-------------------|----------|
|                                       | Pre           | Post     | Pre               | Post     |
| Age (years)                           | 65.1±1.5      |          | 65.2±1.0          |          |
| Weight (kg)                           | 78.3±3.0      | 78.7±3.2 | 83.9±2.7          | 84.1±3.1 |
| Body mass index (kg·m <sup>-2</sup> ) | 25.2±0.9      | 25.5±1.0 | 26.1±0.6          | 26.2±0.9 |
| Body fat (%)                          | 26.2±0.5      | 28.7±0.5 | 26.7±1.5          | 27.4±1.4 |
| Lean body mass (kg)                   | 55.3±1.8      | 54.0±2.0 | 59.9±1.0          | 59.2±1.5 |
| MAP (mmHg)                            | 92.0±2.8      | 90.2±3.3 | 93.1±3.5          | 91.4±3.3 |
| Fasting glucose (mM)                  | 5.2±0.1       | 5.2±0.1  | 5.3±0.2           | 5.2±0.2  |
| Total cholesterol (mM)                | 6.0±0.4       | 6.1±0.4  | 5.7±0.3           | 5.7±0.3  |
| HDL (mM)                              | 1.7±0.2       | 1.7±0.1  | 1.6±0.1           | 1.6±0.1  |
| LDL (mM)                              | 3.8±0.3       | 4.3±0.6  | 3.5±0.3           | 3.6±0.3  |
| HDL/LDL ratio                         | 0.5±0.04      | 0.4±0.05 | 0.5±0.05          | 0.4±0.05 |
| Triglycerides (mM)                    | 1.1±0.1       | 1.3±0.1  | 1.2±0.2           | 1.3±0.2  |

Supp table 1. Basic characteristics before (Pre) and after (Post) 8 weeks of placebo (n = 7) or resveratrol (RSV) (n = 9; 250 mg per day) supplementation. Values are presented as means ± SE. Mean arterial pressure (MAP), high density lipoproteins (HDL), low density lipoproteins (LDL).

Supp table 2. Plasma cytokines

|                      | <u>Placebo</u> |         | <u>RSV</u> |         | <u>T-Placebo</u> |         | <u>T-RSV</u> |         |
|----------------------|----------------|---------|------------|---------|------------------|---------|--------------|---------|
|                      | Pre            | post    | Pre        | post    | Pre              | post    | Pre          | post    |
| TNF $\alpha$ (pg/ml) | 3.5±0.5        | 3.2±0.5 | 3.2±0.4    | 3.7±0.5 | 3.2±0.3          | 3.2±0.1 | 3.4±0.3      | 3.7±0.3 |
| IL-6 (pg/ml)         | 2.0±0.4        | 2.5±0.6 | 2.3±0.3    | 2.5±0.3 | 2.4±0.5          | 2.0±0.3 | 2.8±0.4      | 3.0±0.4 |
| CRP (mg/l)           | 1.6±0.4        | 1.7±0.2 | 2.6±0.8    | 2.6±0.7 | 1.1±0.1          | 1.1±0.1 | 3.0±0.7      | 2.4±0.7 |

Supp table 2. Plasma tumor necrosis factor (TNF) $\alpha$ , interleukin (IL)-6 and c-reactive protein (CRP) obtained from placebo (n = 7), resveratrol (RSV) (n = 9; 250 mg per day), exercise training and placebo (n = 13) and exercise training and RSV (n = 14; 250 mg per day) supplemented subjects pre and post 8 weeks of intervention. Values are presented as means ± SE.
